# Supplementary material for: Harmine Hydrochloride Mediates the Induction of G2/M Cell Cycle Arrest in Breast Cancer Cells by Regulating the MAPKs and AKT/FOXO3a Signaling Pathways
Source: MDPI journal article supplement (doi:10.3390/molecules26216714), 2021-11-05

B

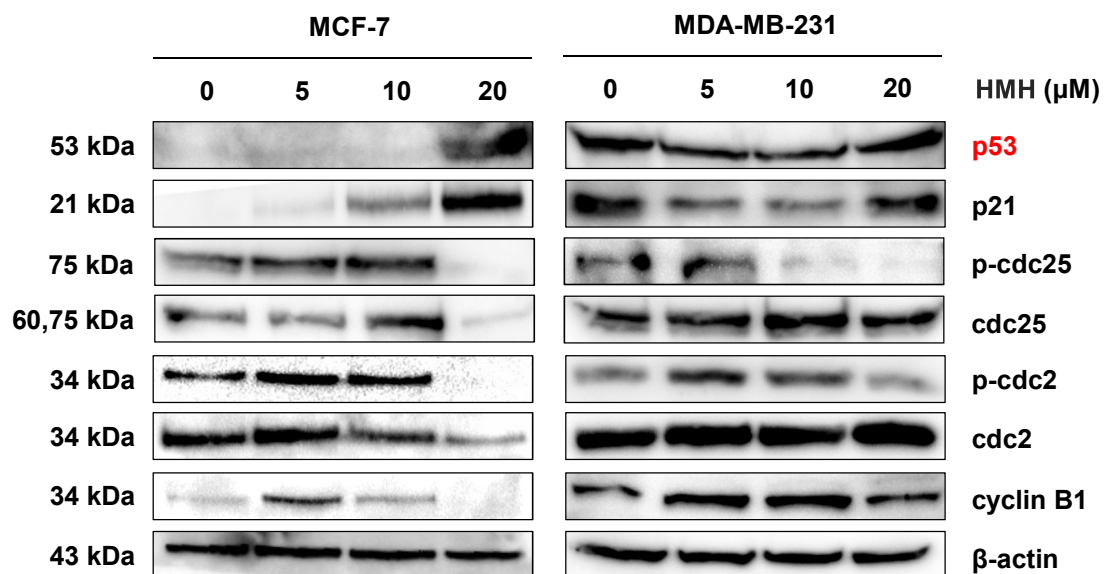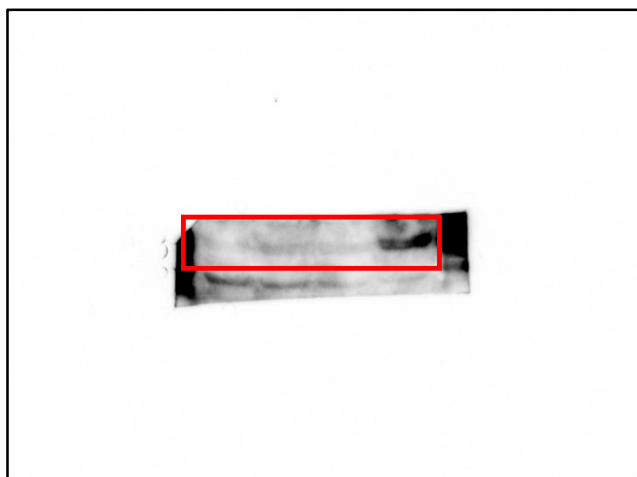

intensity ratio of each band

**0.3      0.5      0.2      2.0**

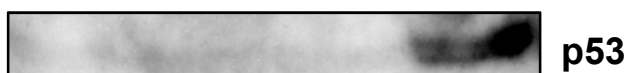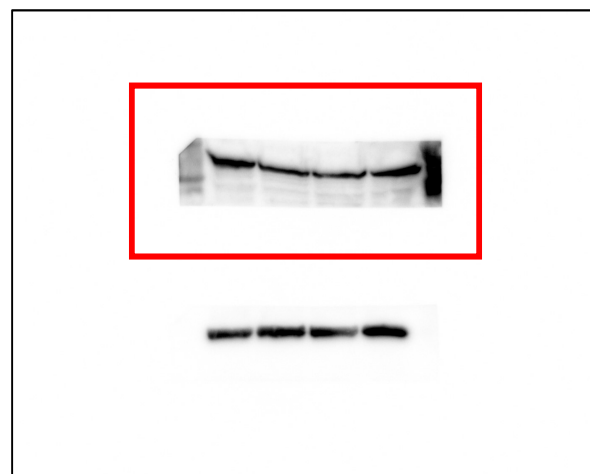

intensity ratio of each band

**0.9      0.6      0.5      1.4**

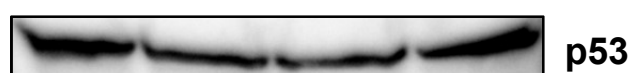

B

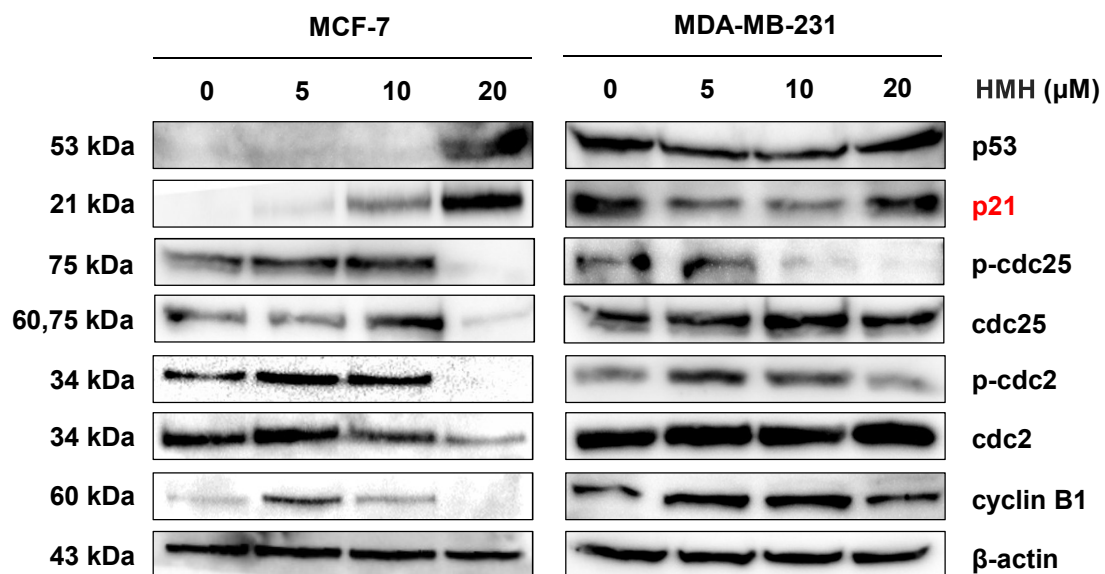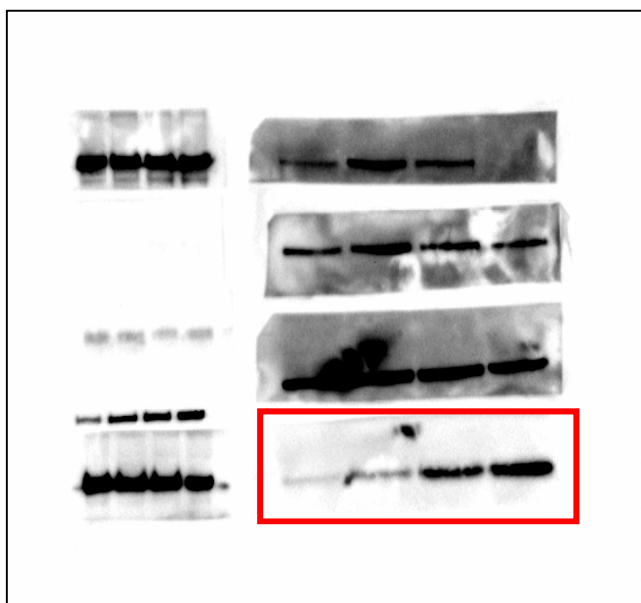

intensity ratio of each band

0.2      0.5      1.1      1.6

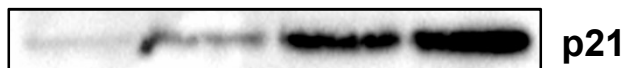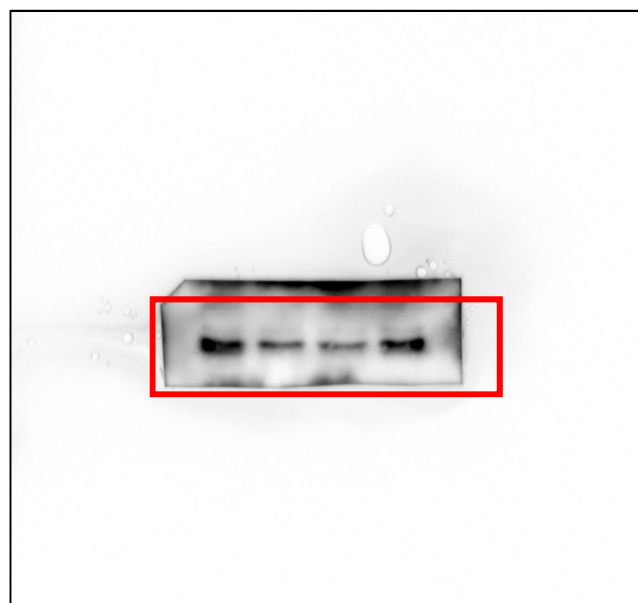

intensity ratio of each band

1.4      0.7      0.7      1.5

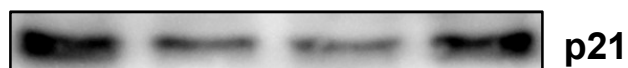

B

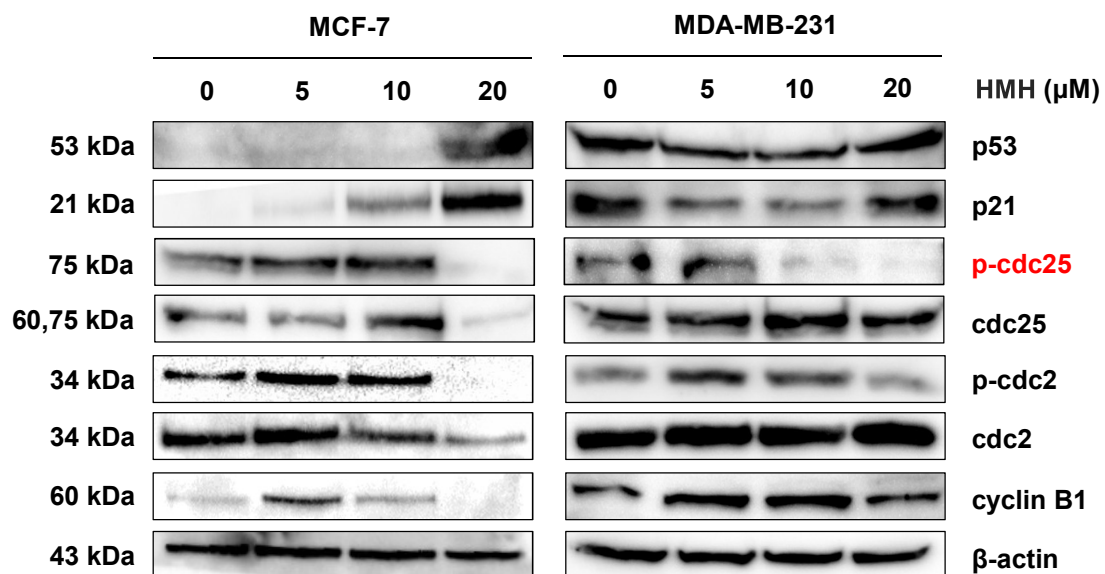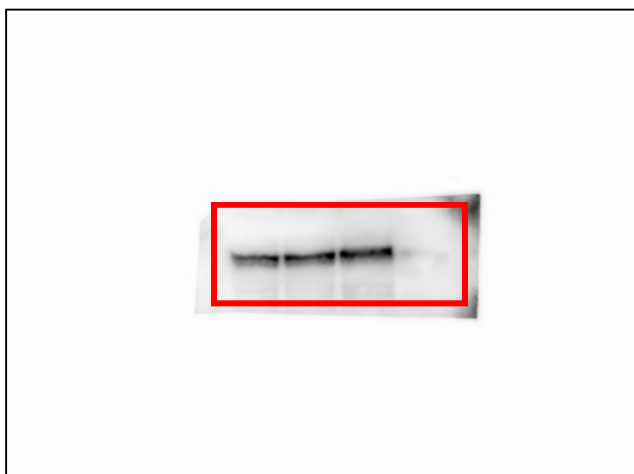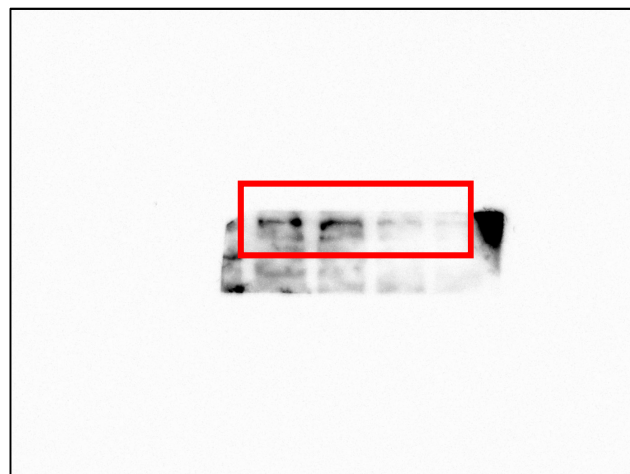

intensity ratio of each band

0.7    1.0    1.2    0.1

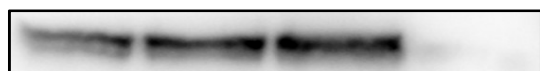

p-cdc25

intensity ratio of each band

1.0    1.0    0.2    0.1

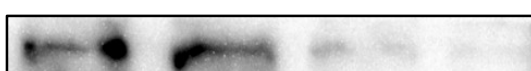

p-cdc25

B

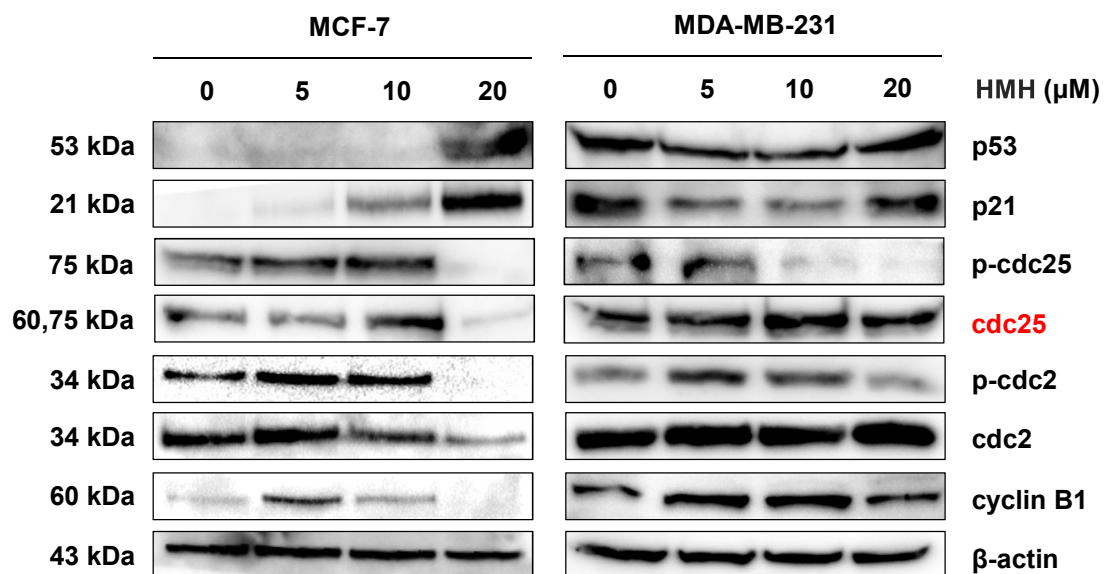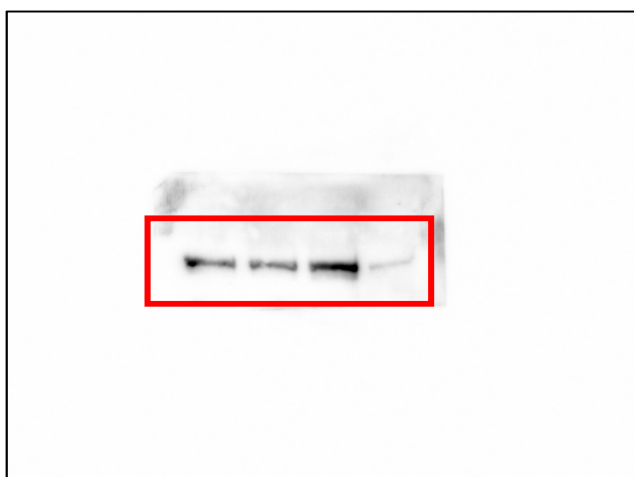

intensity ratio of each band

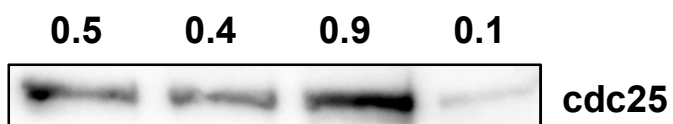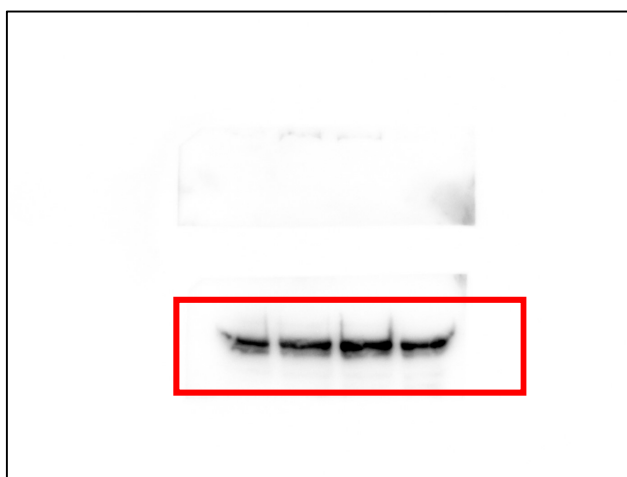

intensity ratio of each band

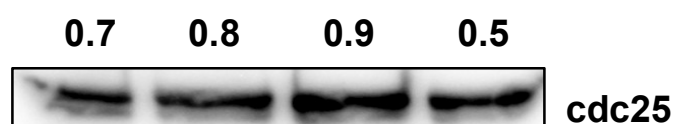

B

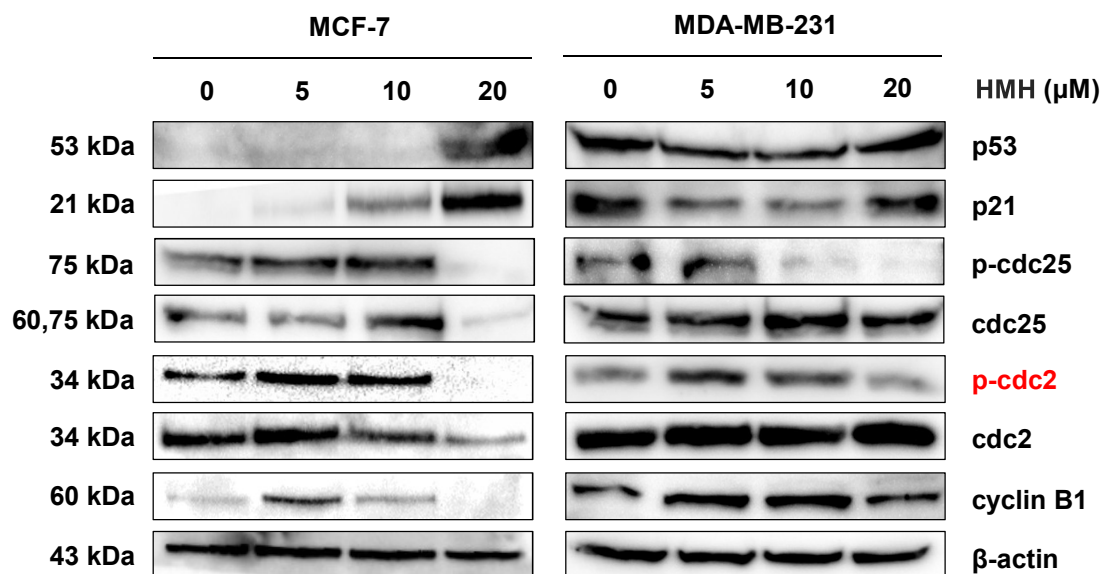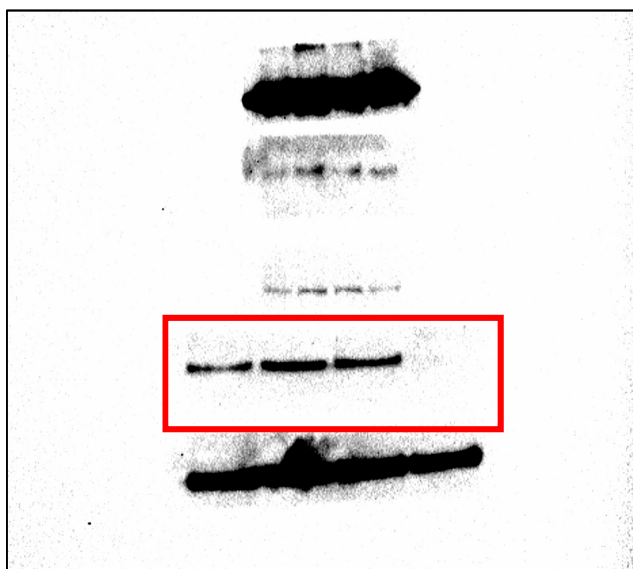

intensity ratio of each band

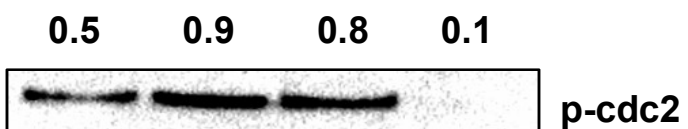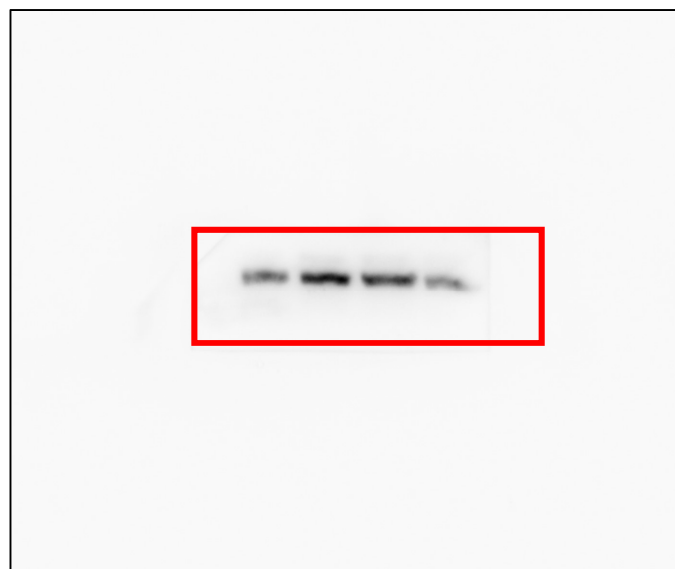

intensity ratio of each band

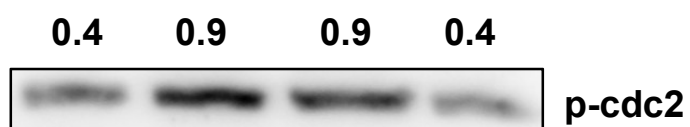

B

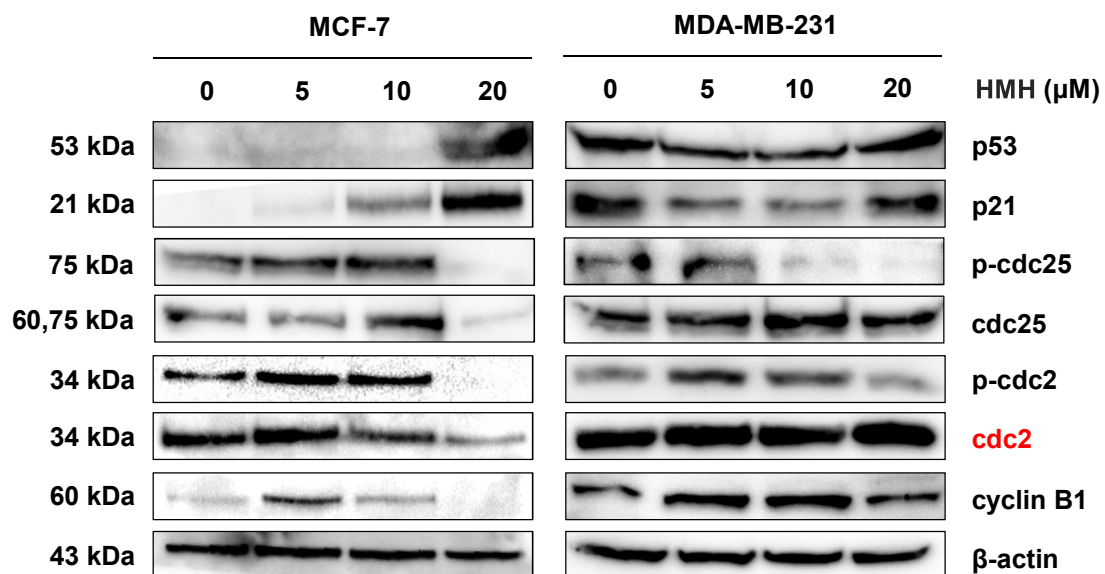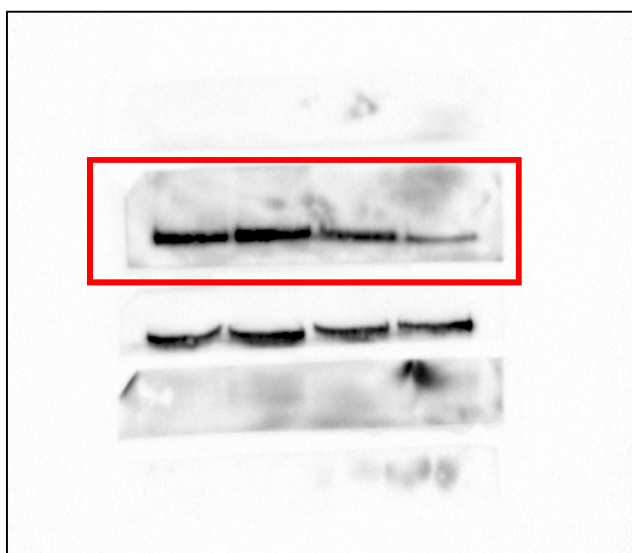

intensity ratio of each band

1.0    1.2    0.8    0.3

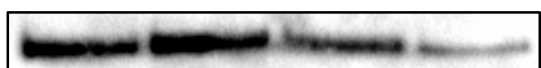

cdc2

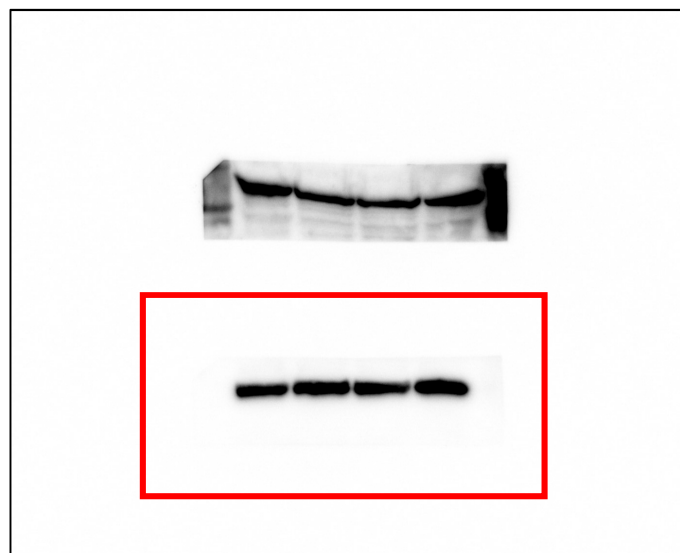

intensity ratio of each band

1.3    1.8    1.6    1.9

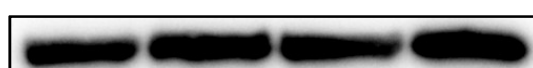

cdc2

B

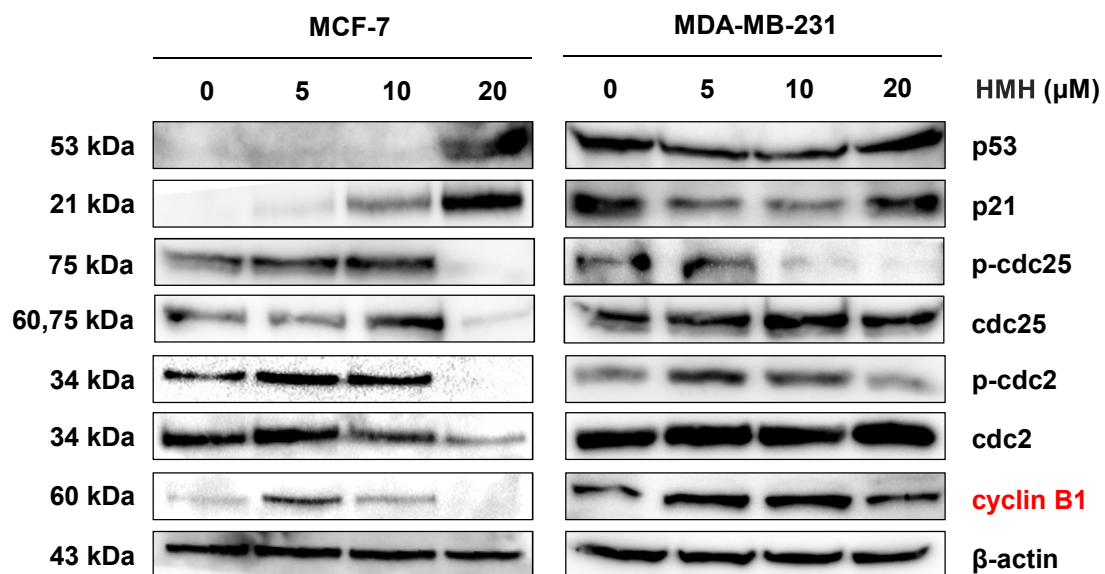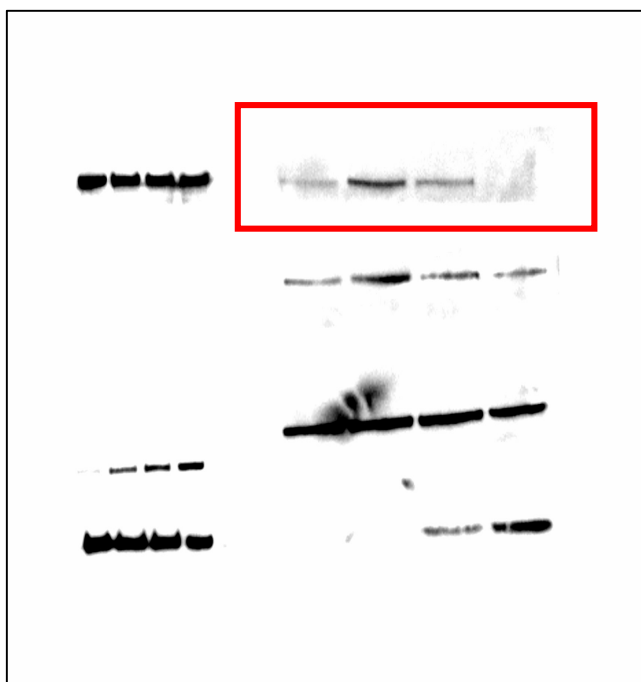

intensity ratio of each band

0.2      0.5      0.3      0.1

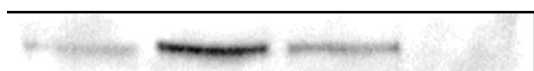

cyclin B1

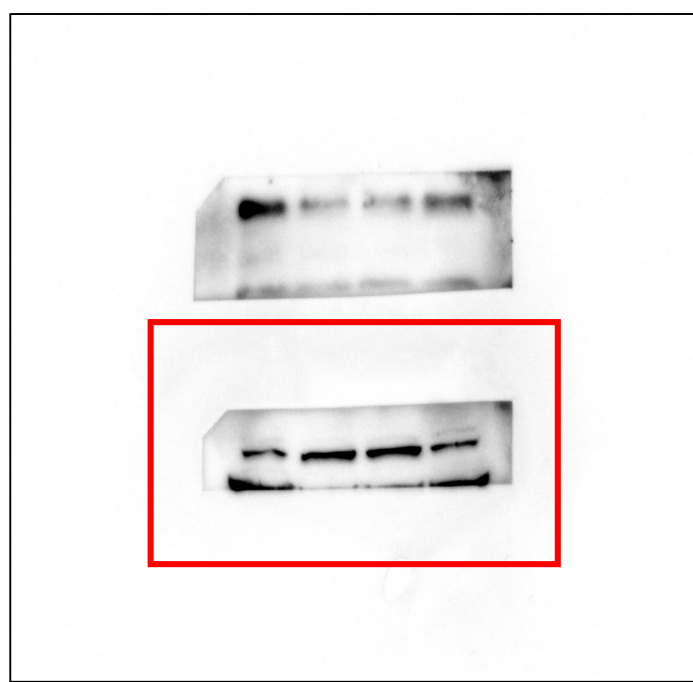

intensity ratio of each band

0.7      1.2      1.4      1.2

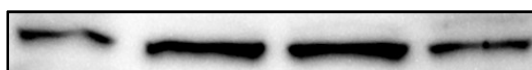

cyclin B1



B

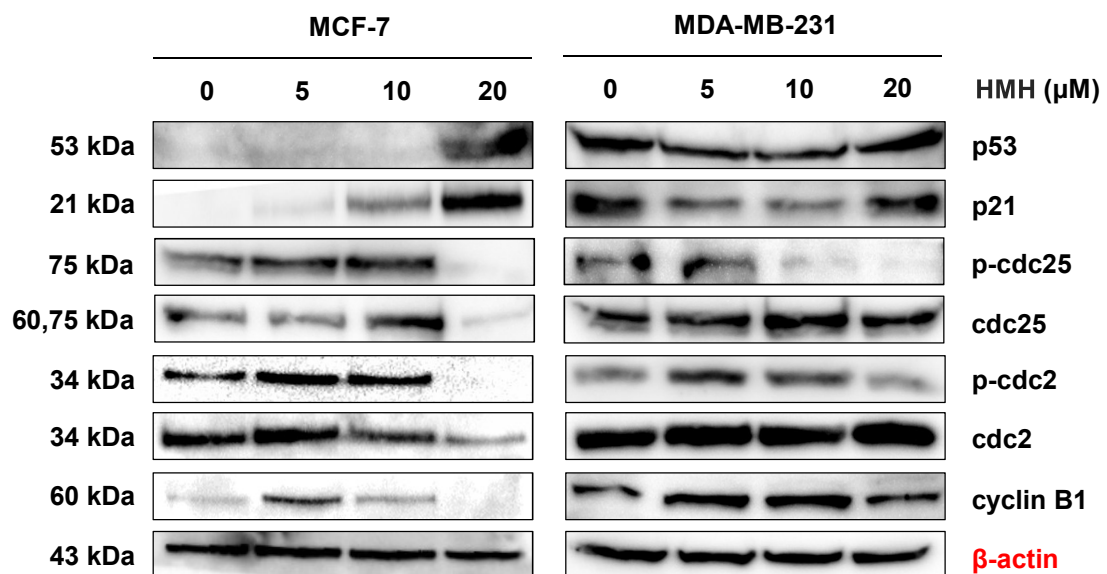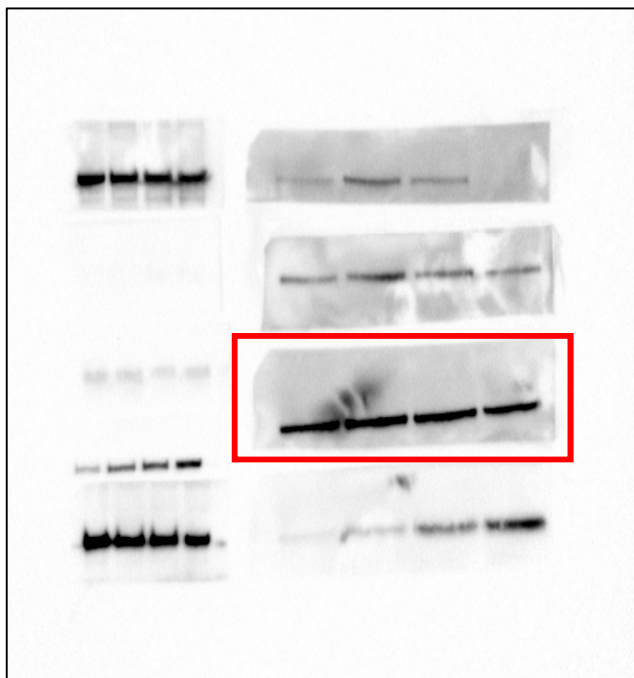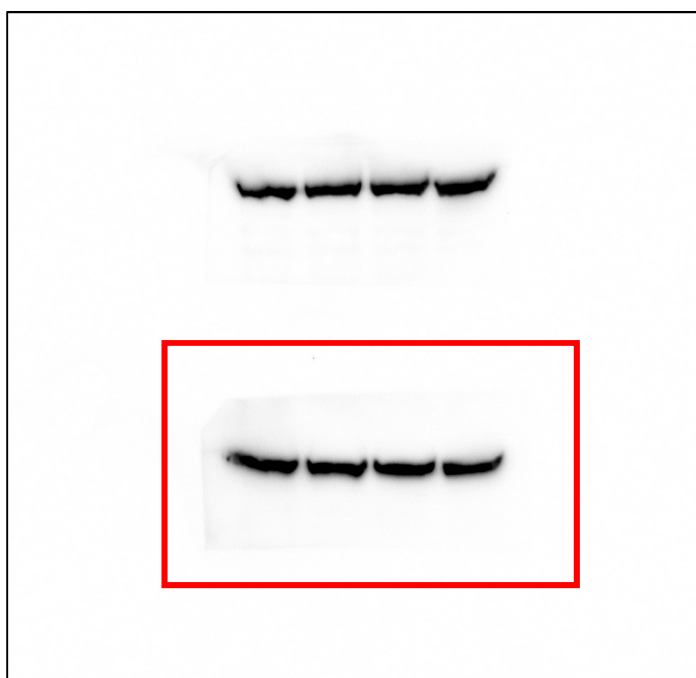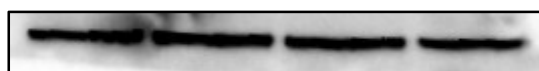

$\beta$ -actin

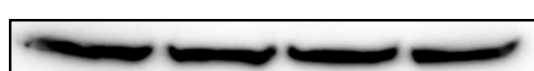

$\beta$ -actin



A

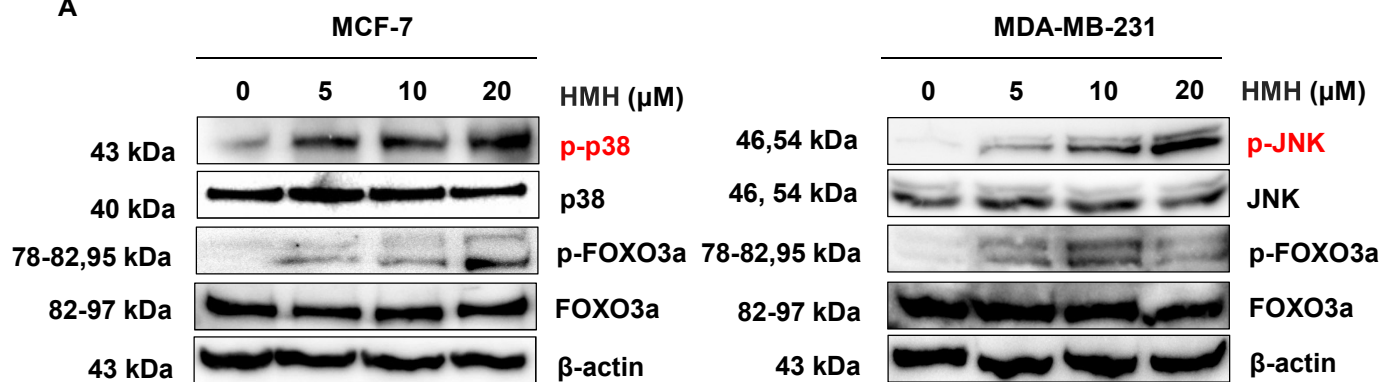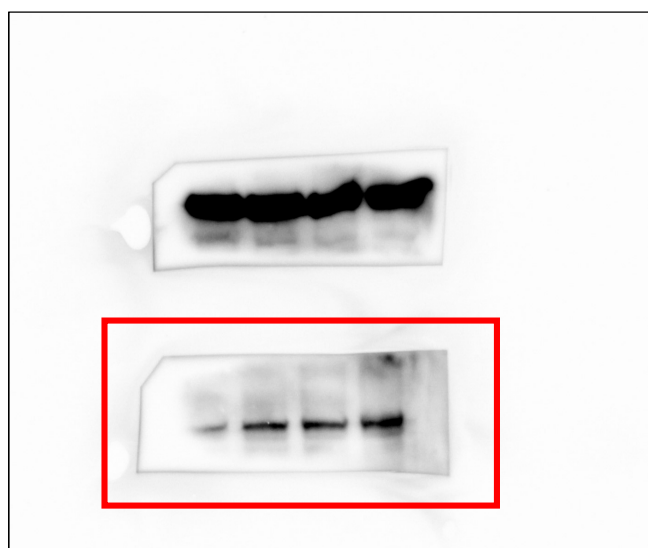

intensity ratio of each band

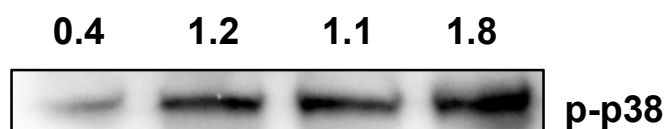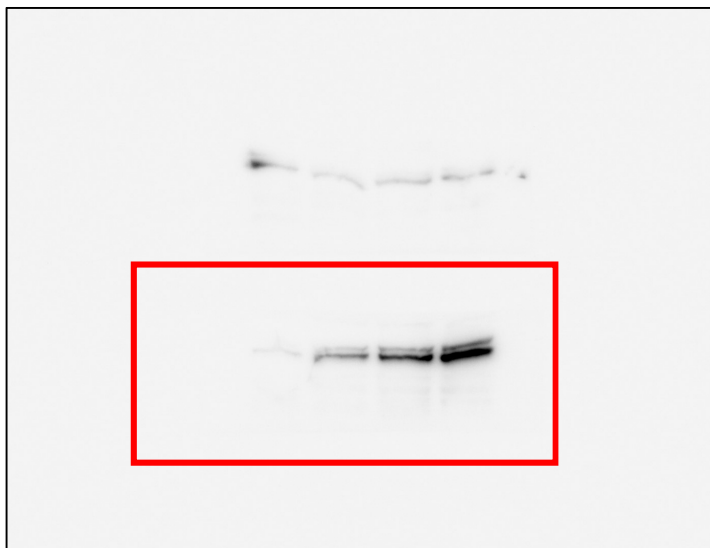

intensity ratio of each band

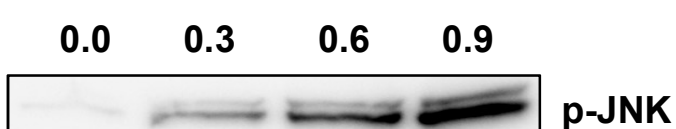

A

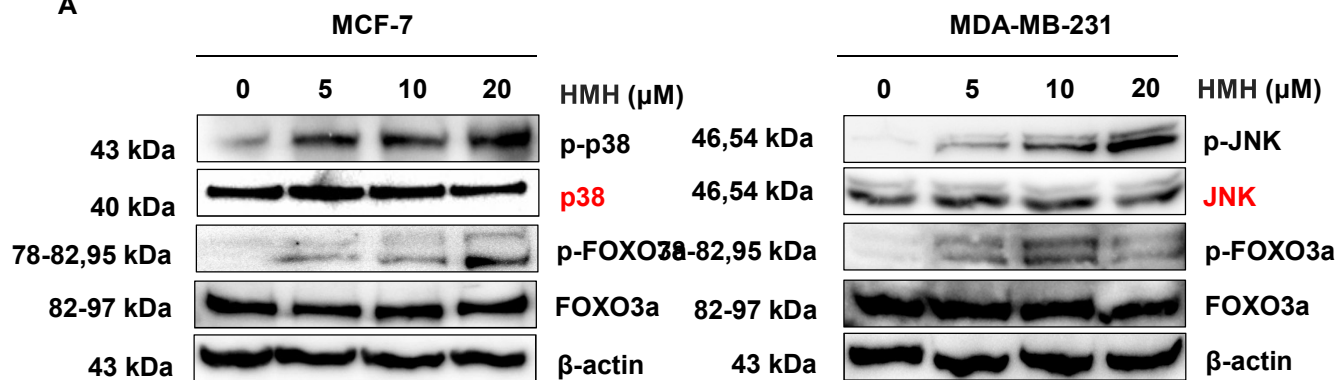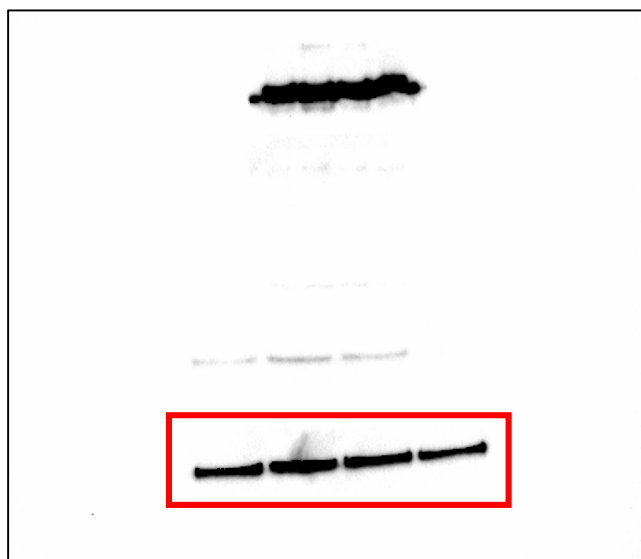

intensity ratio of each band

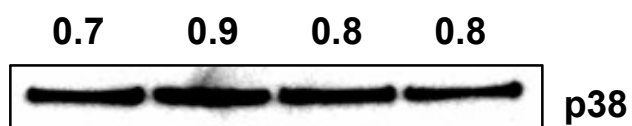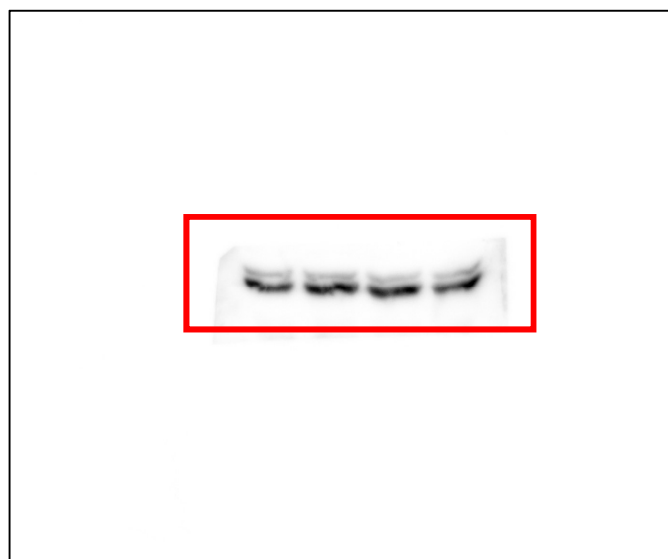

intensity ratio of each band

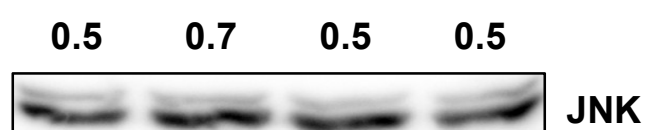

A

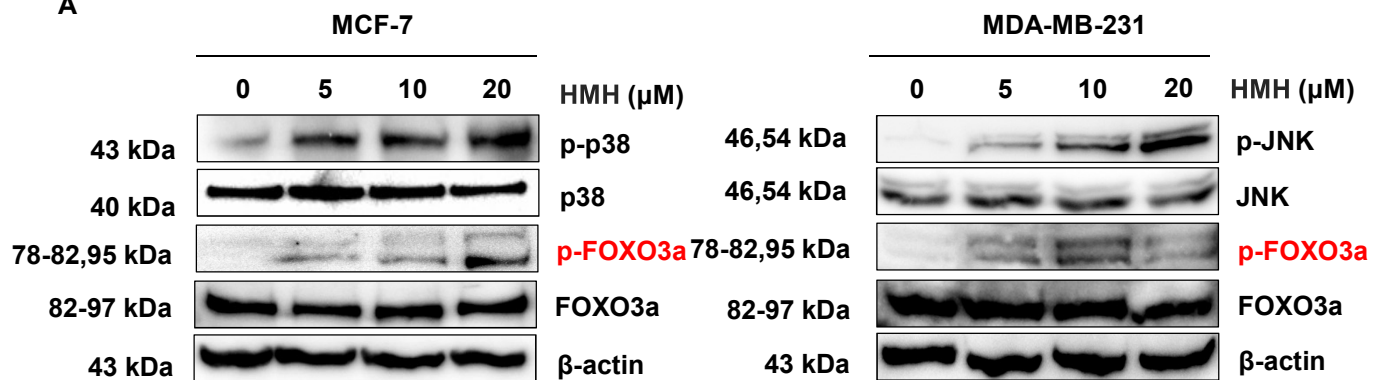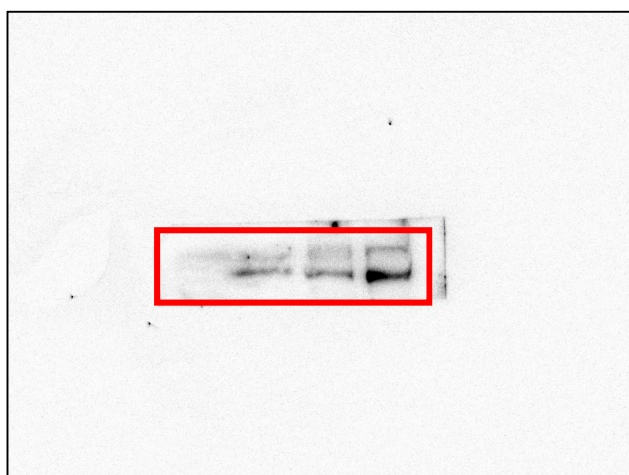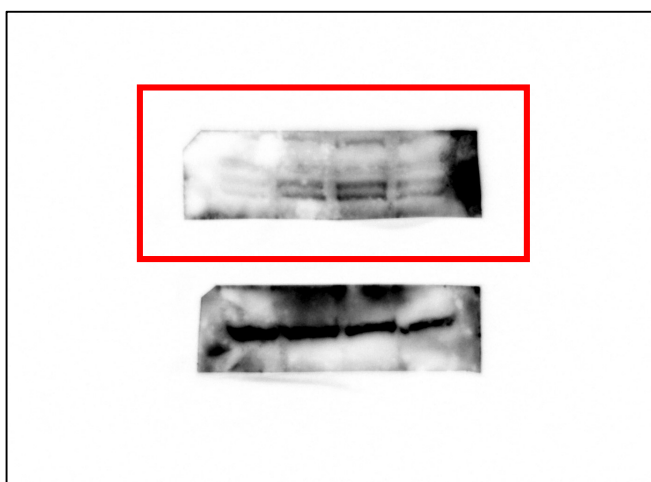

intensity ratio of each band

0.1    0.4    0.4    0.9

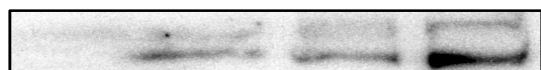

p-FoxO3a

intensity ratio of each band

0.1    0.8    1.3    0.8

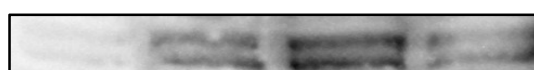

p-FoxO3a

A

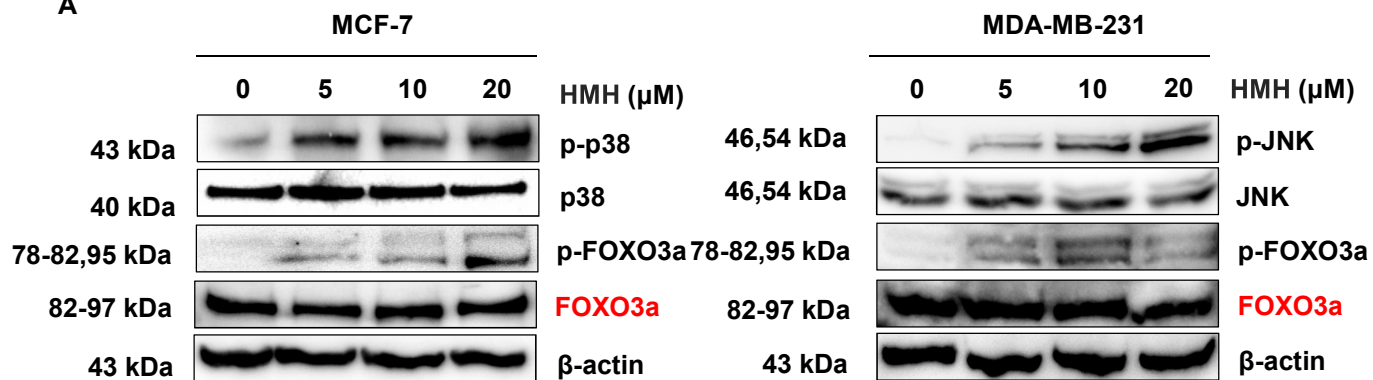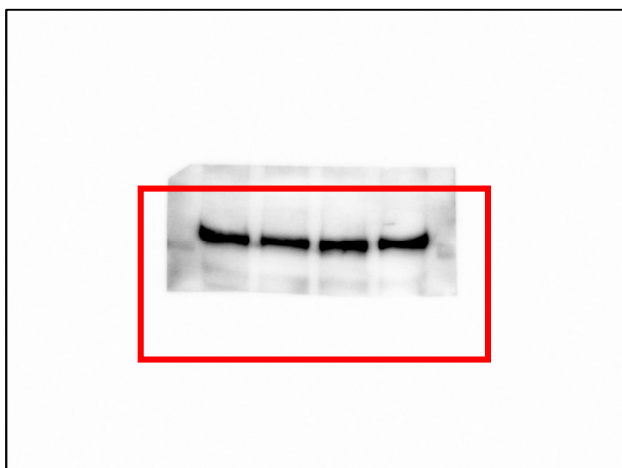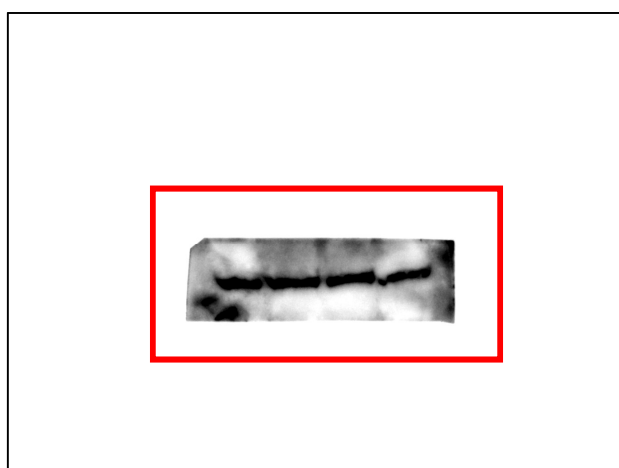

intensity ratio of each band

1.0    0.7    0.8    0.9

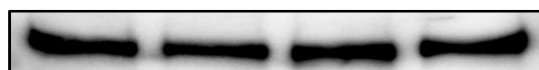

FoxO3a

intensity ratio of each band

1.0    1.2    0.8    0.4

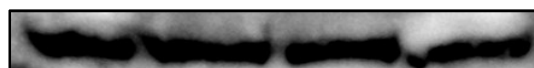

FoxO3a

A

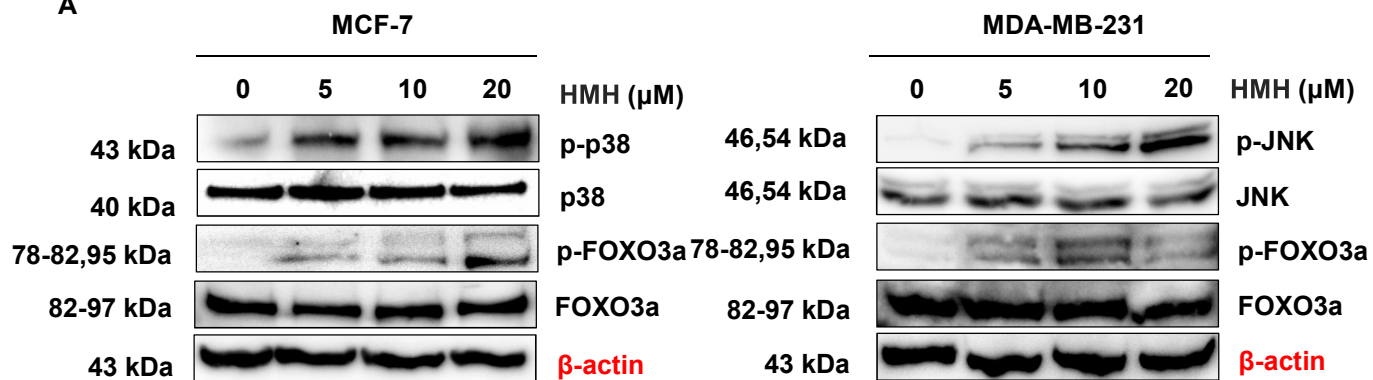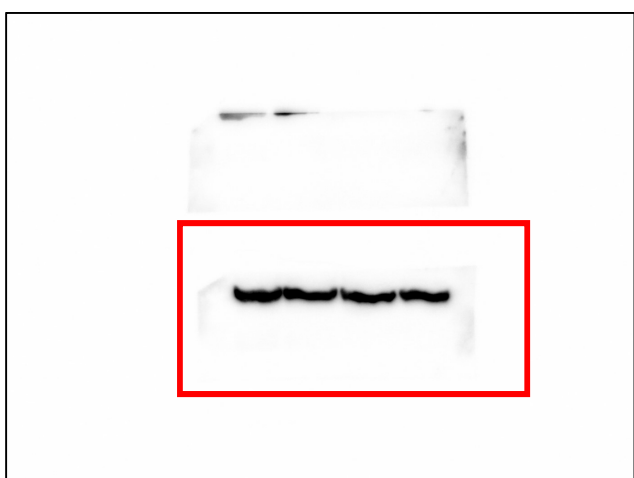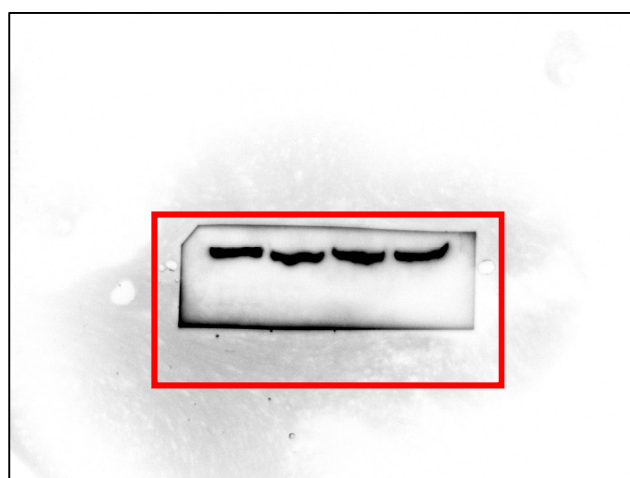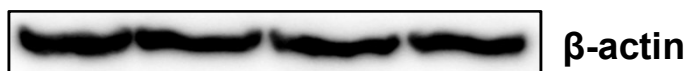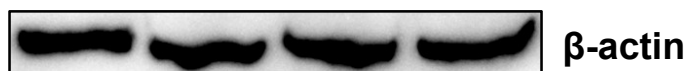

B

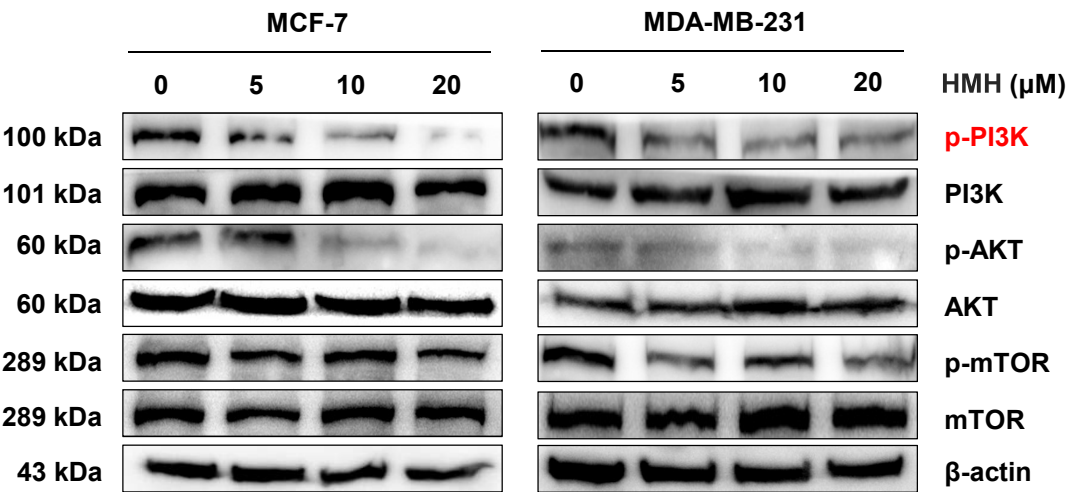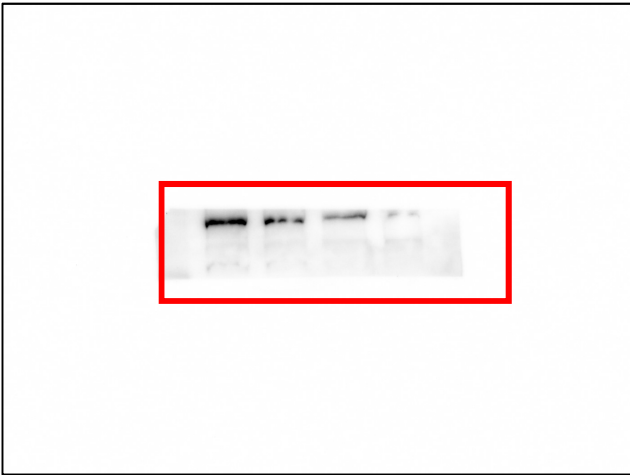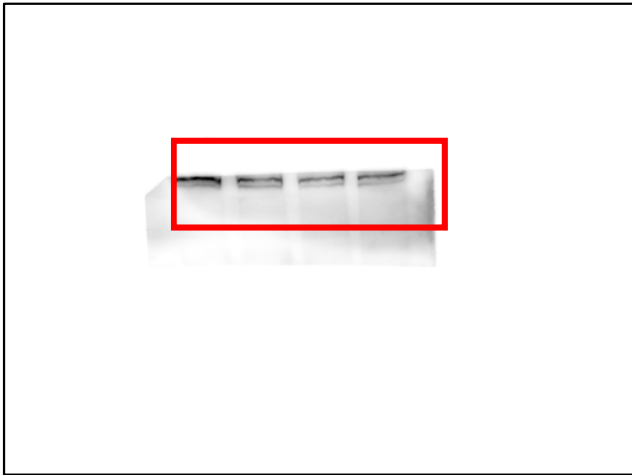

intensity ratio of each band

1.1      0.7      0.5      0.1

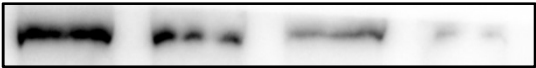

p-PI3K

intensity ratio of each band

0.9      0.7      0.6      0.6

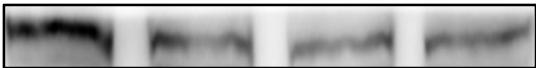

p-PI3K



B

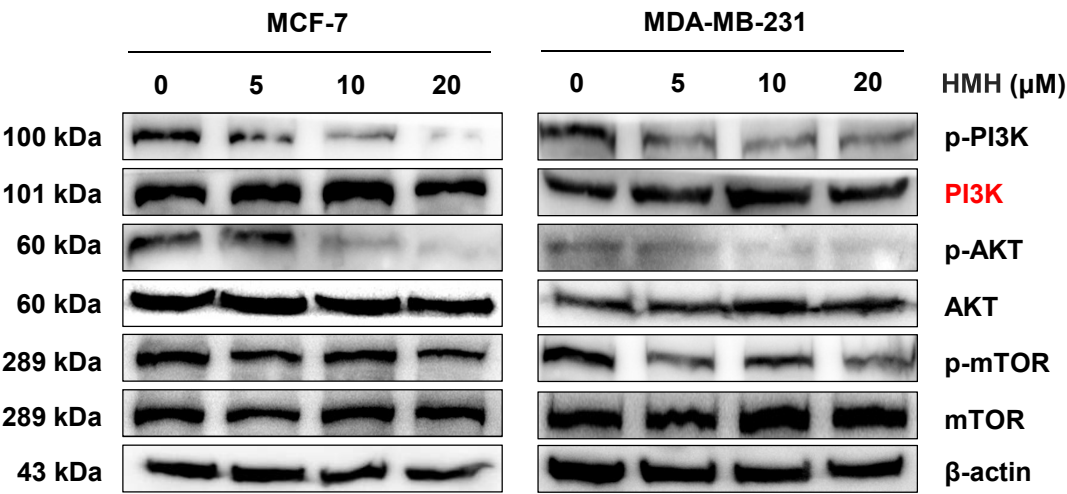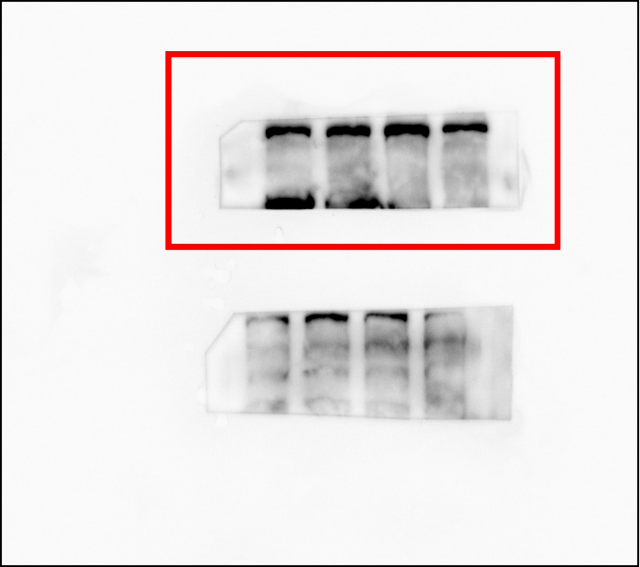

intensity ratio of each band

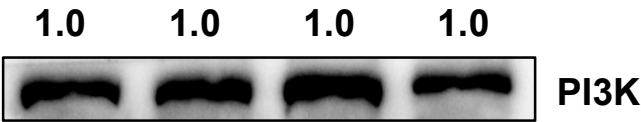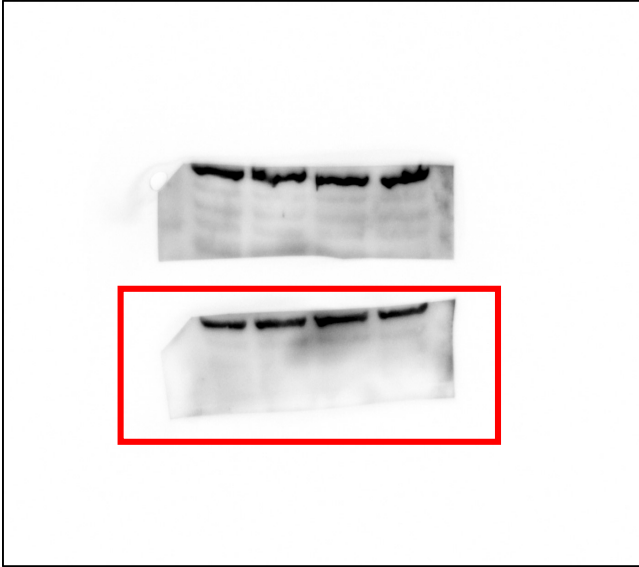

intensity ratio of each band

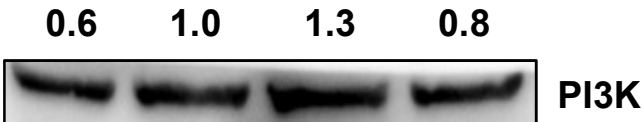

B

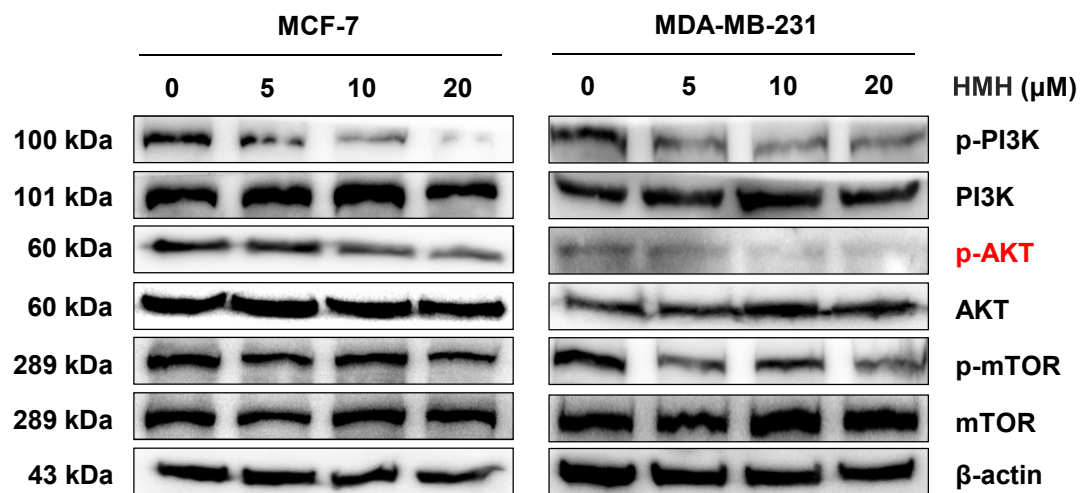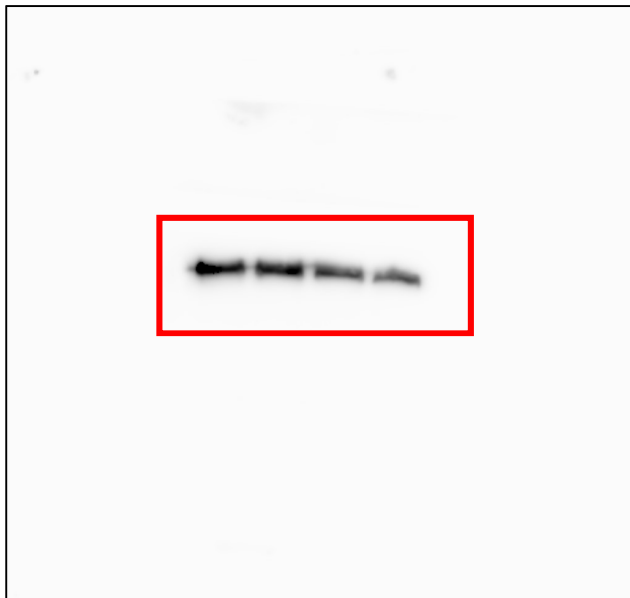

intensity ratio of each band

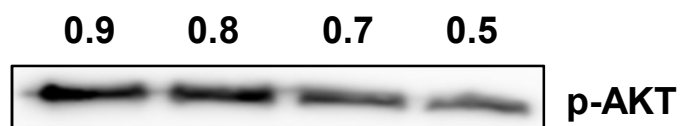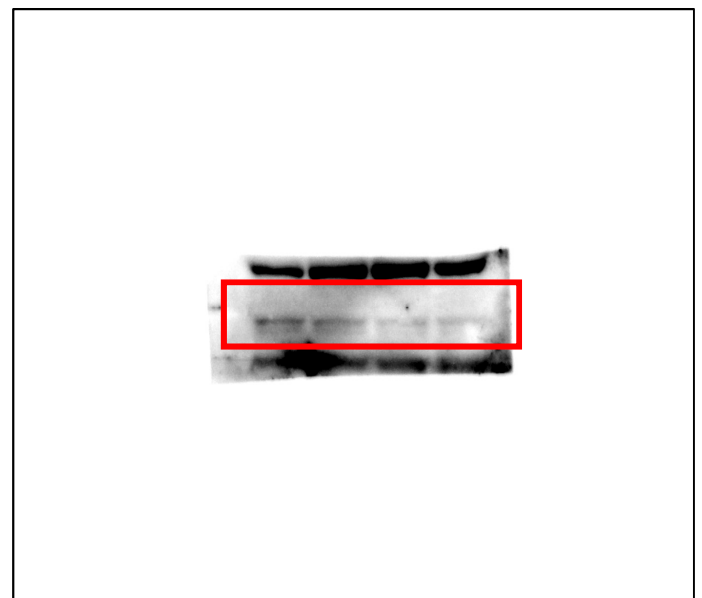

intensity ratio of each band

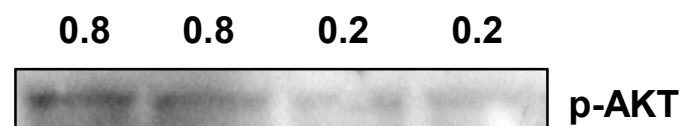

B

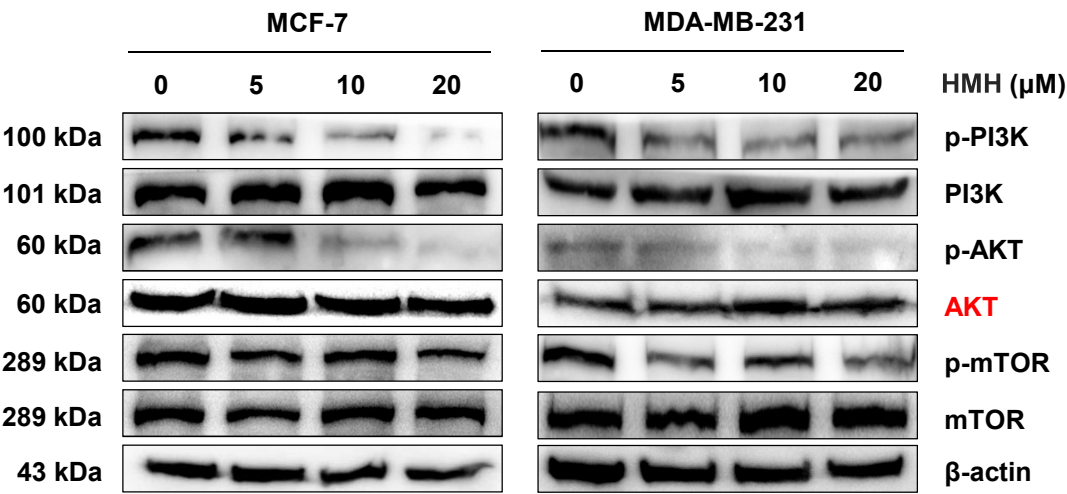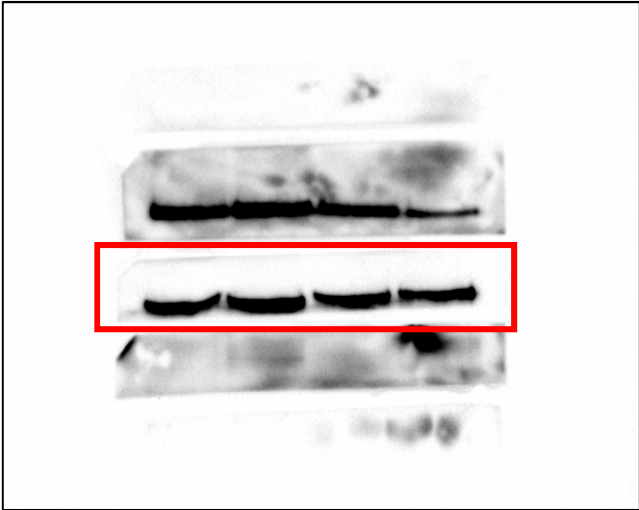

intensity ratio of each band

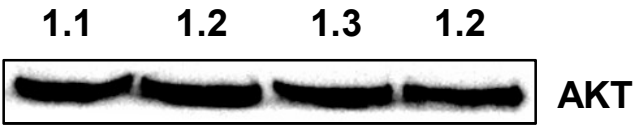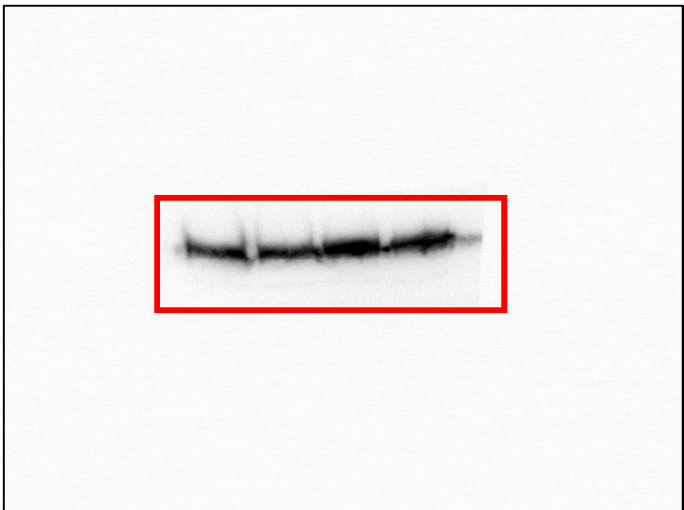

intensity ratio of each band

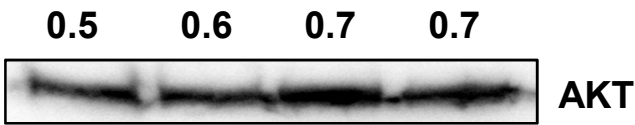

B

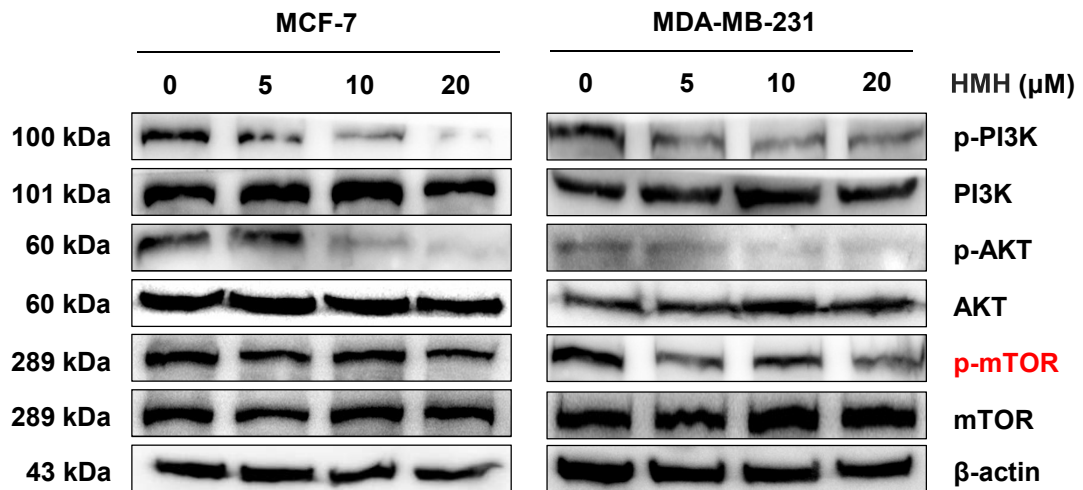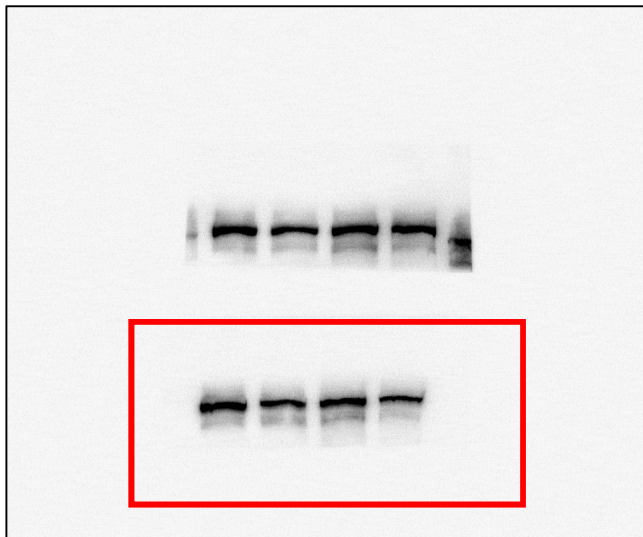

intensity ratio of each band

1.4      1.2      1.6      1.1

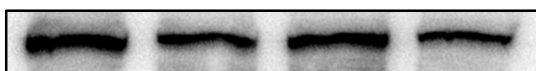

p-mTOR

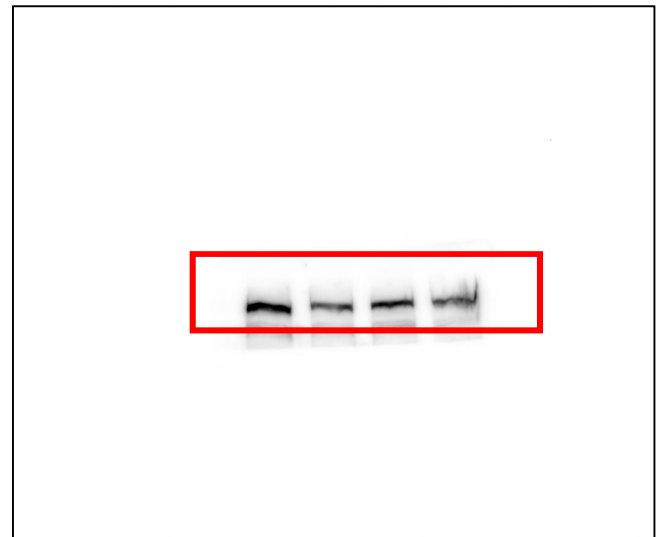

intensity ratio of each band

0.8      0.5      0.7      0.6

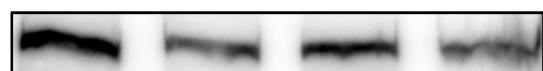

p-mTOR

B

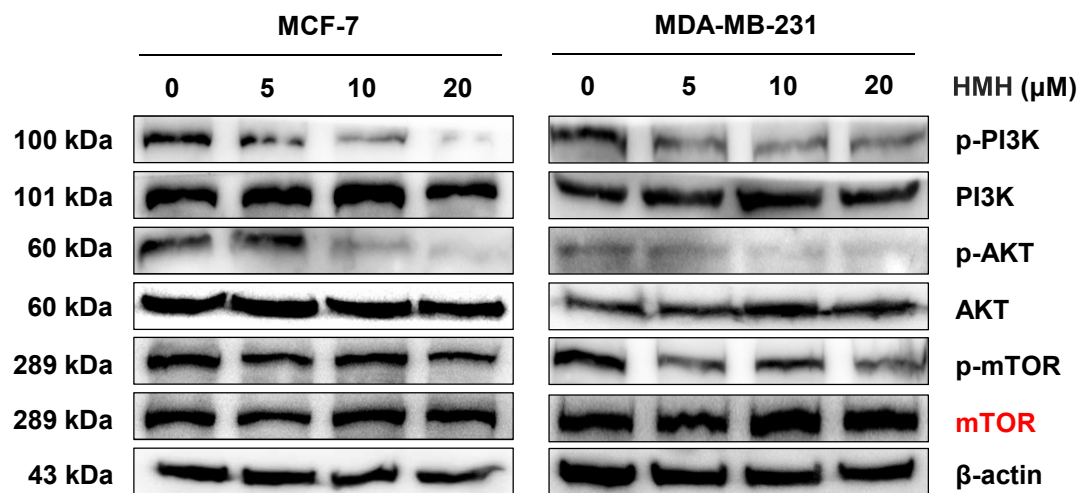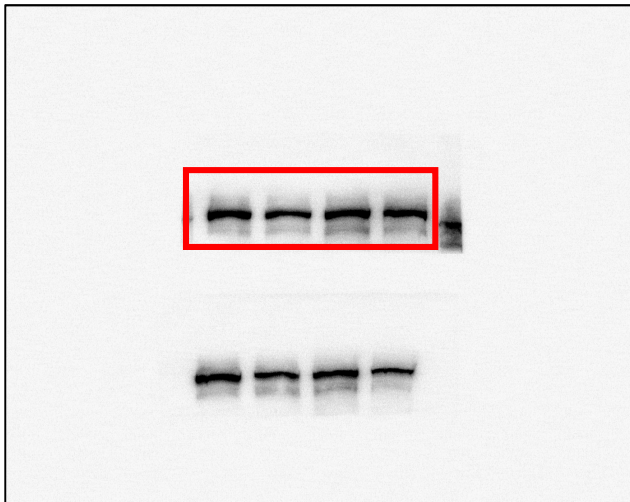

intensity ratio of each band

1.3    0.9    1.5    1.3

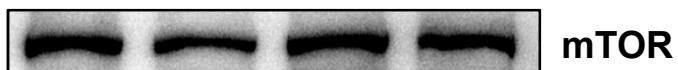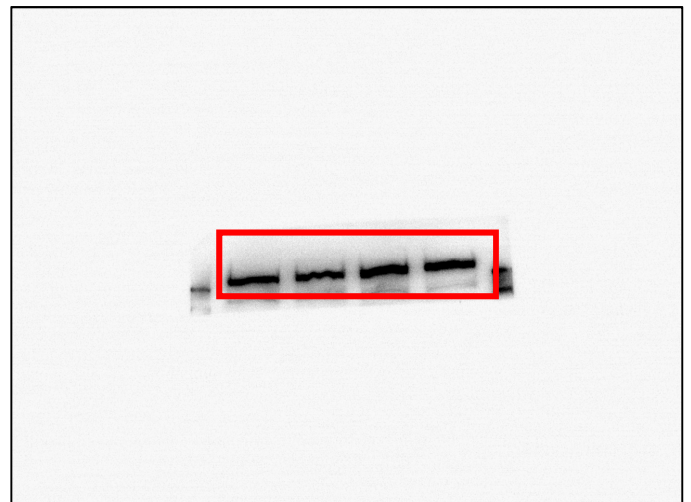

intensity ratio of each band

1.1    1.2    1.5    1.4

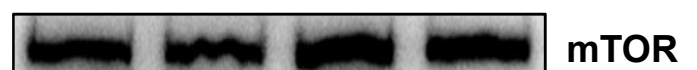

B

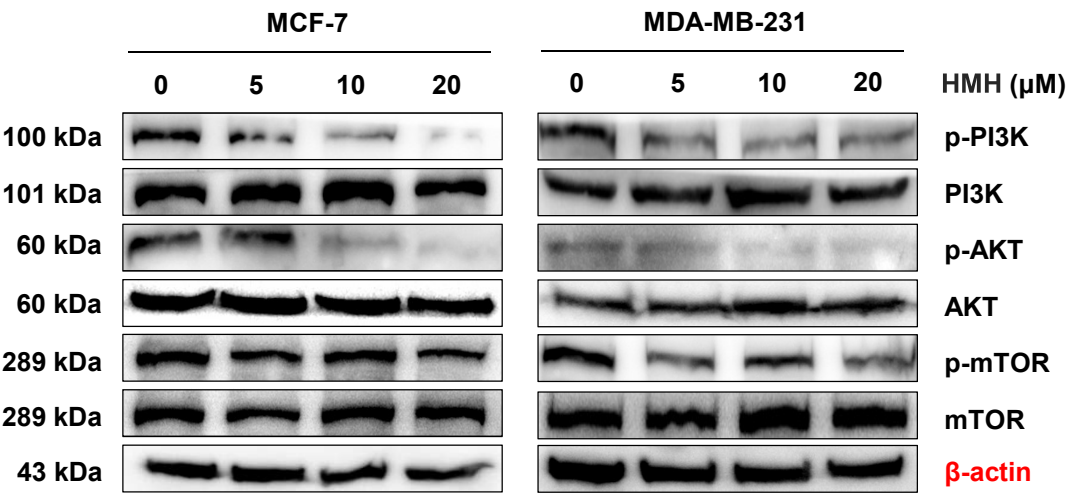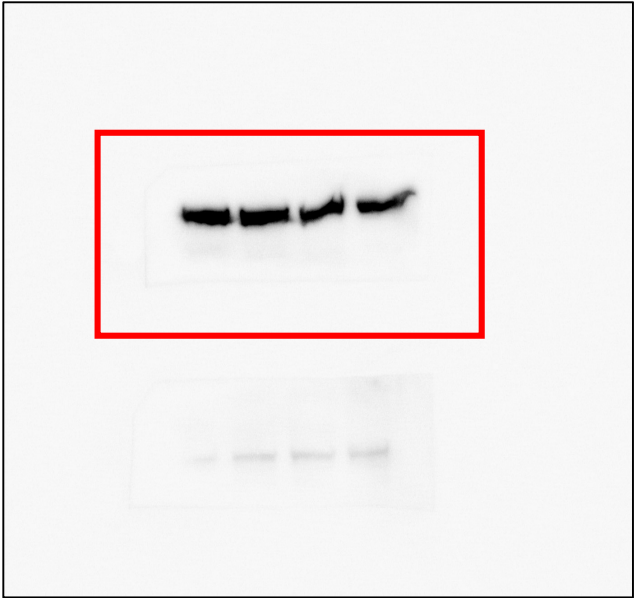

intensity ratio of each band

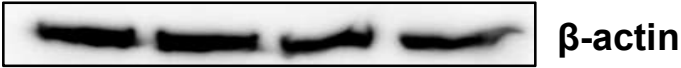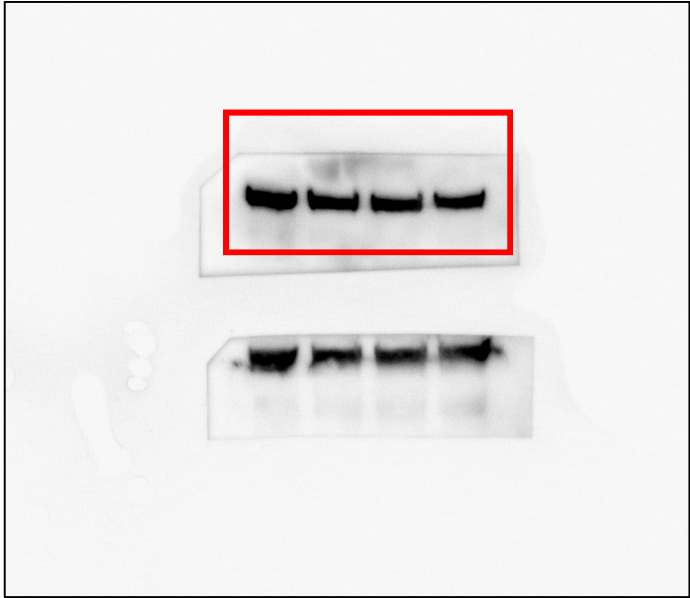

intensity ratio of each band

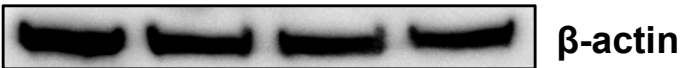



C

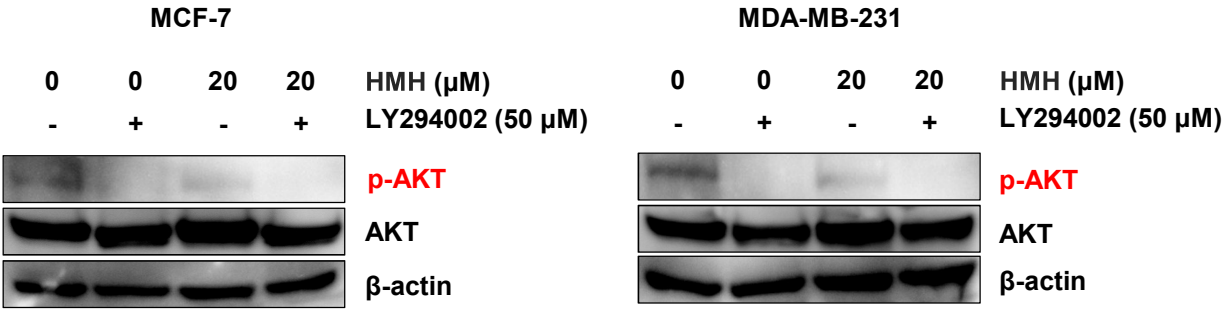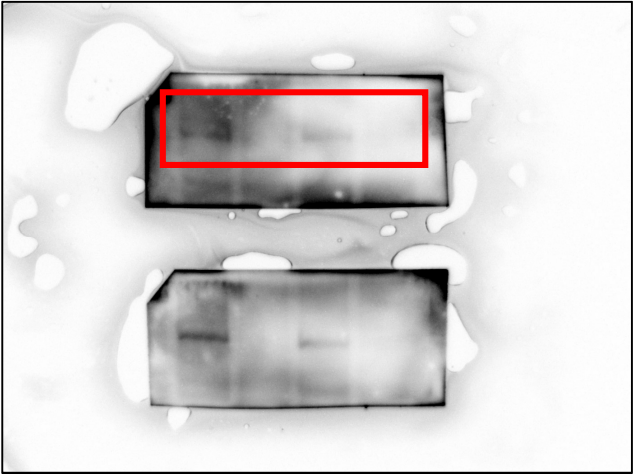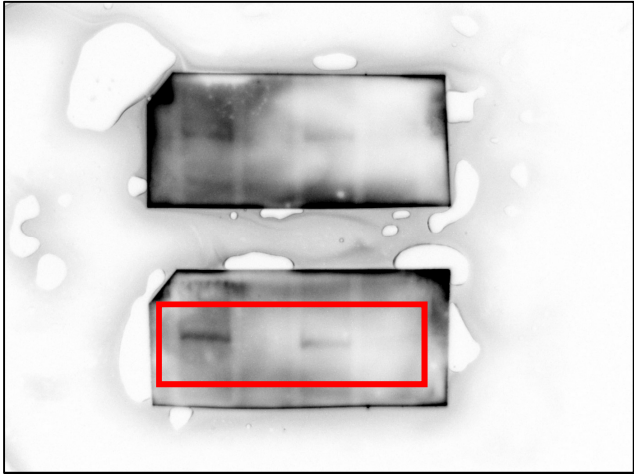

intensity ratio of each band

0.5    0.1    0.2    0.0

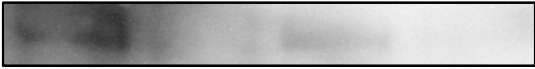

p-AKT

intensity ratio of each band

0.9    0.2    0.2    0.1

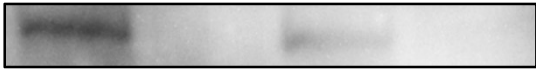

p-AKT

C

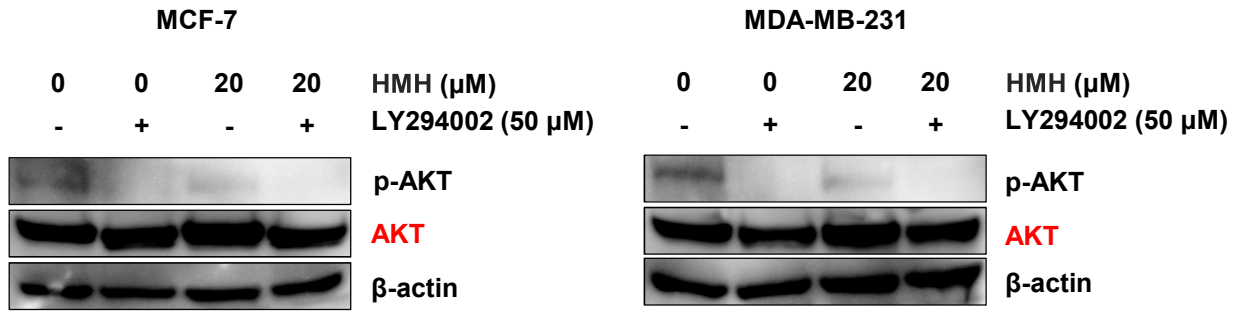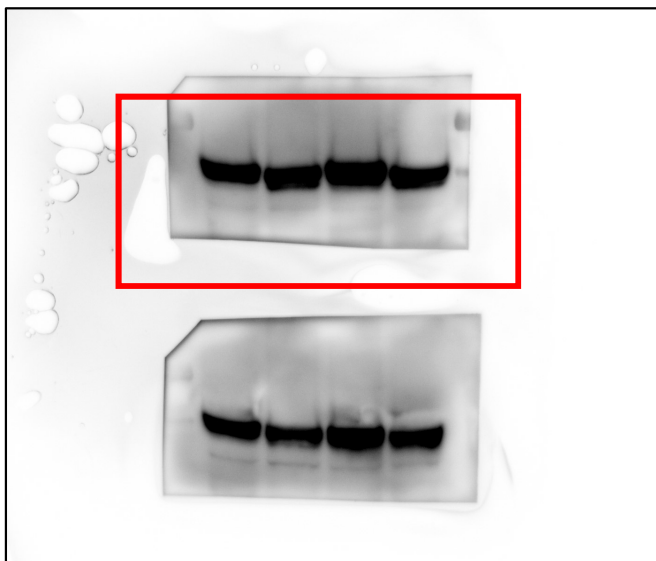

intensity ratio of each band

0.7      0.8      0.9      0.9

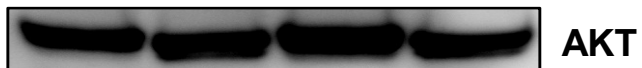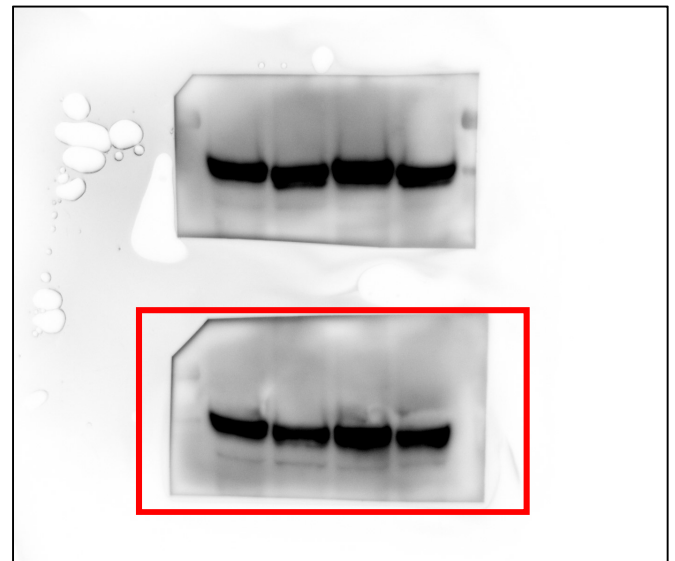

intensity ratio of each band

1.0      1.0      1.0      0.9

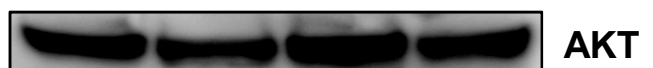

C

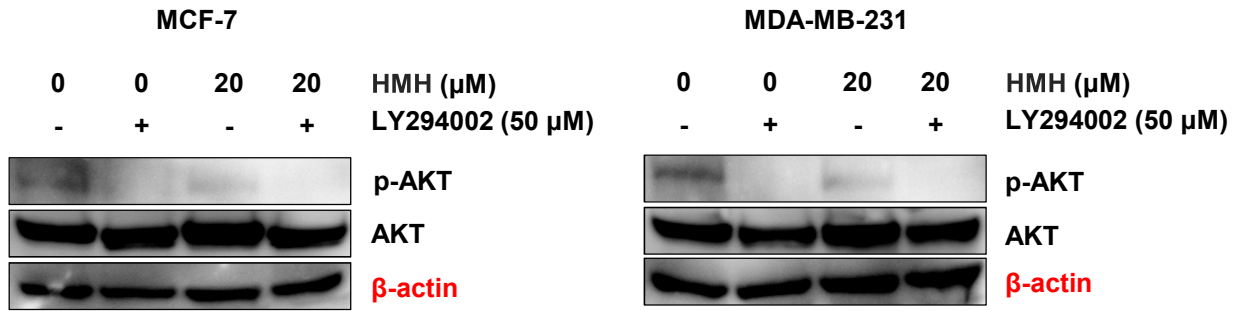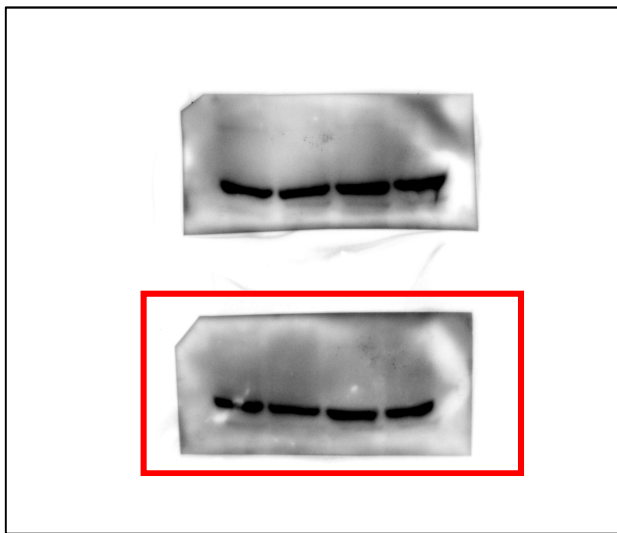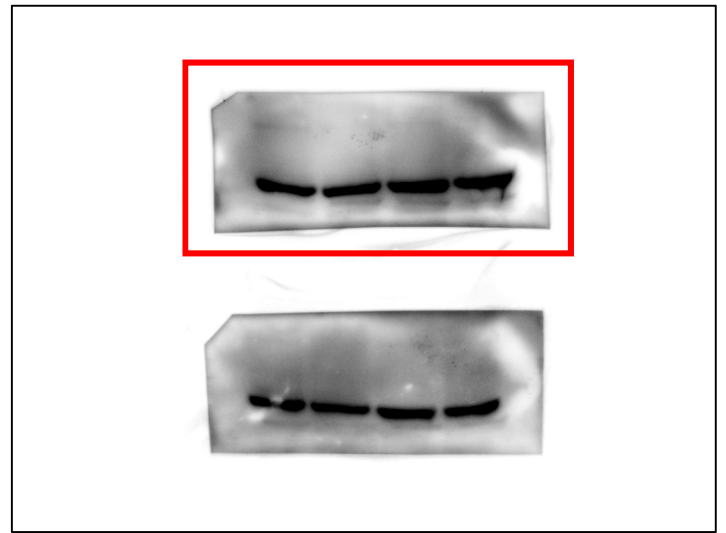

intensity ratio of each band

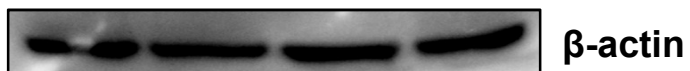

intensity ratio of each band

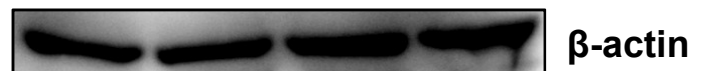

Supplement: s1 [file s1]
